# Supplementary material for: Hydrogen induced interface engineering in Fe2O3–TiO2 heterostructures for efficient charge separation for solar-driven water oxidation in photoelectrochemical cells
Source: Royal Society of Chemistry journal article supplement (doi:10.1039/d0ra09655e), 2021-01-01
Supplement: d0ra09655e1.pdf [file d0ra09655e1.pdf]

## Supplementary Information

### Hydrogen Induced Interface Engineering in $\text{Fe}_2\text{O}_3\text{-TiO}_2$ Heterostructures for Efficient Charge Separation for Solar-driven Water Oxidation in Photoelectrochemical Cells

Aadesh P. Singh<sup>1,\*</sup>, Richard Baochang Wang<sup>2</sup>, Camilla Tossi<sup>1</sup>, Ilkka Tittonen<sup>1</sup>, Björn Wickman<sup>2</sup>, Anders Hellman<sup>2,\*</sup>

<sup>1</sup>Department of Electronics and Nanoengineering, School of Electrical Engineering, Aalto University, P.O. Box 13500, 00076 AALTO, Finland

<sup>2</sup>Division of Chemical Physics, Department of Physics, Chalmers University of Technology, SE-412 96 Göteborg, Sweden

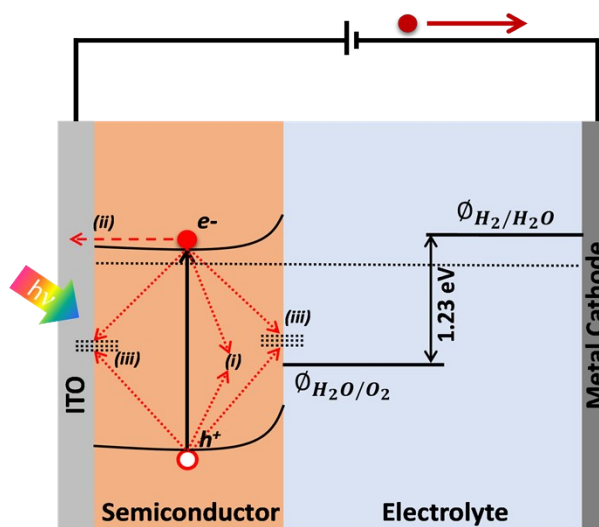

**Figure S1:** Schematic band alignment of hematite photoanode for PEC water oxidation. Creation of photogenerated electron-hole pair, migration of holes to the hematite surface for water oxidation to oxygen, and migration of electrons to the back charge collector metal cathode for water reduction to hydrogen. The four possible recombination sites that are unfavorable to complete the water oxidation and reduction in a PEC cell are: i) bulk charge recombination, ii) poor charge collection efficiency, iii) surface trapping and recombination and iv) interfacial carrier trapping and recombination.

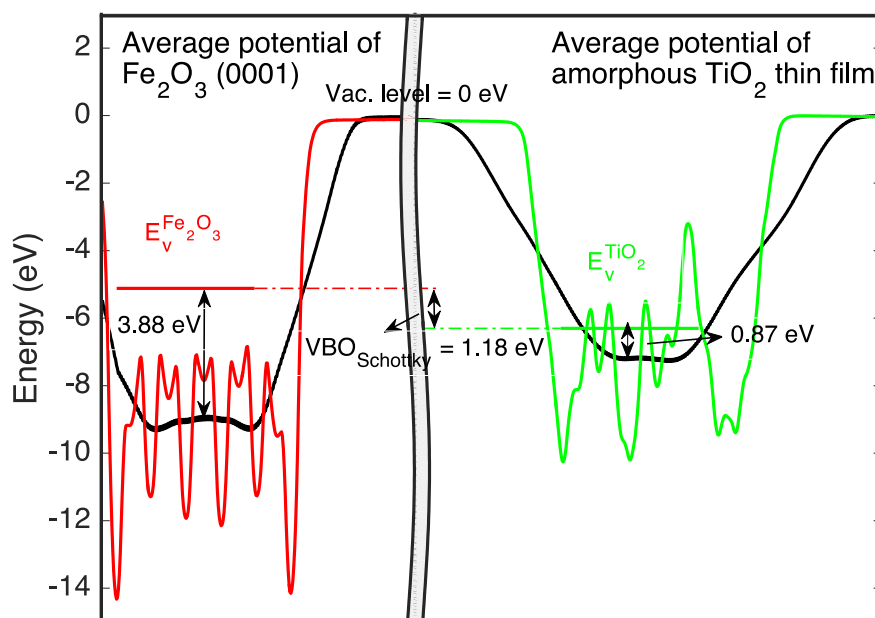

**Figure S2:** The calculated the VBO of individual systems of  $\text{Fe}_2\text{O}_3$  (0001) and a- $\text{TiO}_2$  thin film.

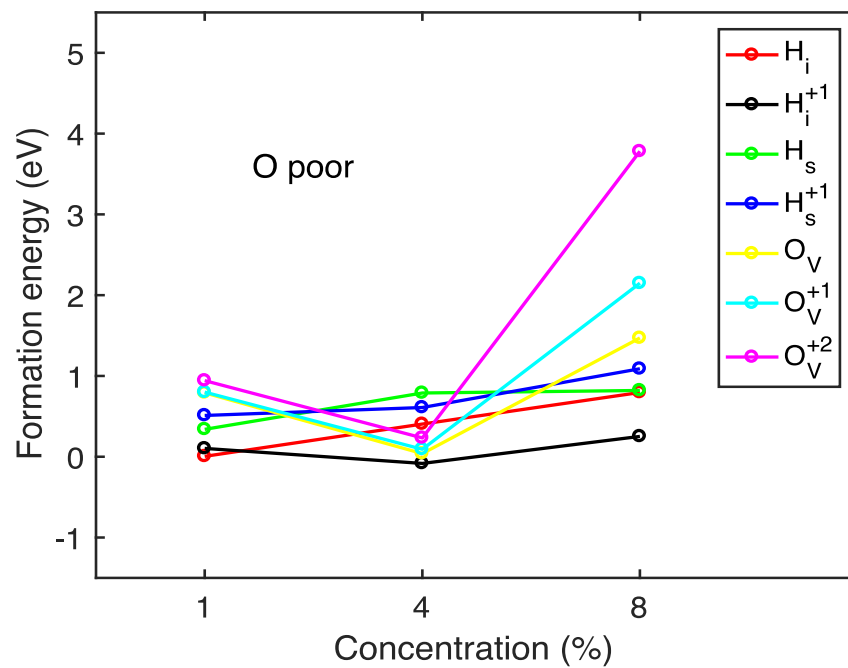

**Figure S3:** The calculated formation energy of various defects in anatase varying with the defect concentration under O-poor conditions. The Fermi energy is set to  $E_f = 3.0$  eV

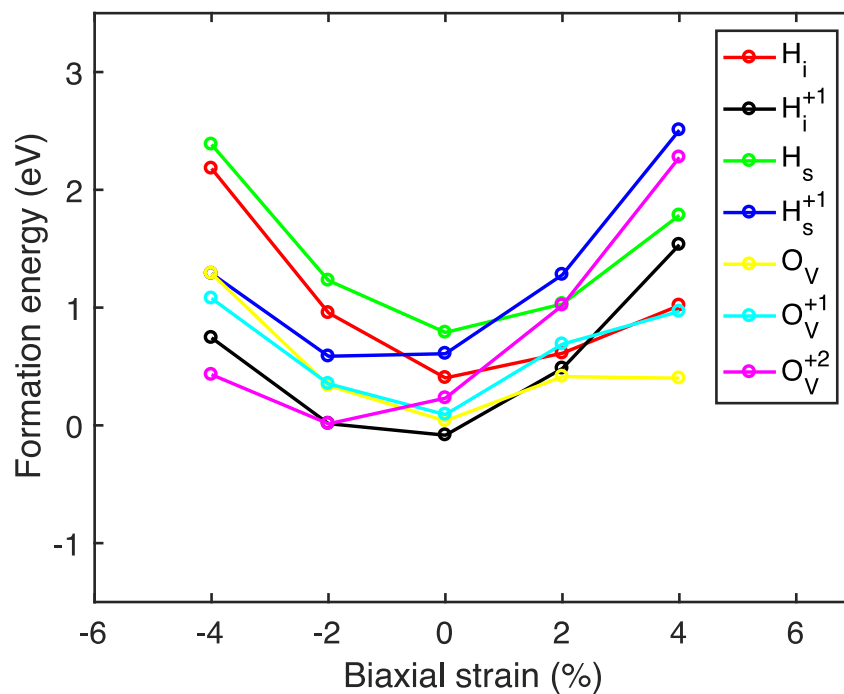

**Figure S4:** The calculated formation energy of different charged/neutral defects under biaxial strain from -4% to +4% under O-poor conditions. The Fermi energy is set to  $E_f = 3.0$  eV.

**Table S1.** Formation energy of H interstitial, substitutional H and O vacancy in a-TiO<sub>2</sub> calculated with the PBE + U method.

| H in a-TiO <sub>2</sub> | formation energy |
|-------------------------|------------------|
| H_i_2O                  | 8.77             |
| H_i_3O                  | -0.407           |
| H_i_1x2                 | -1.04            |
| H_i_1x3                 | -1.69            |
| H_s                     | 3.838            |
| O_v                     | 7.840            |

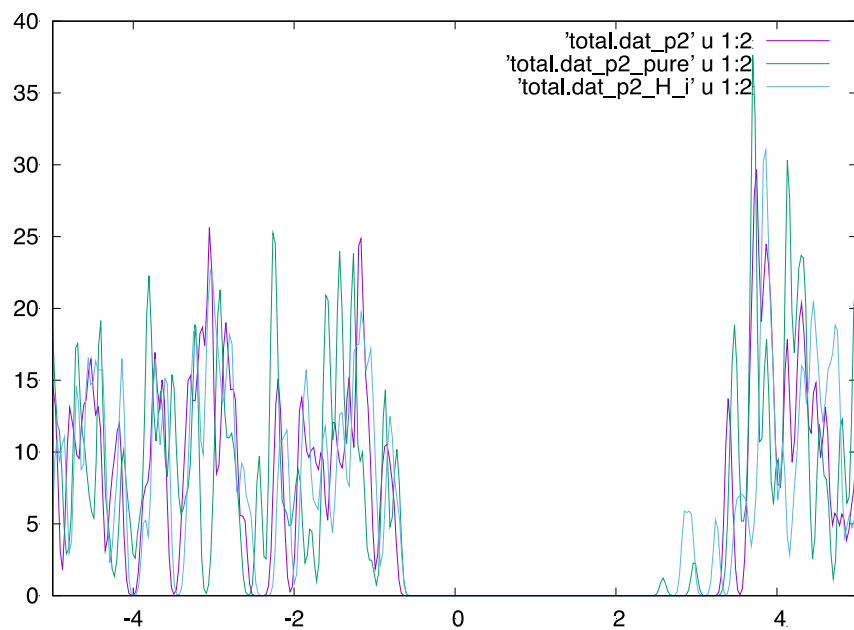

**Figure S5:** The DOS of pure anatase,  $H_i$  and  $H_i^+$  doped anatase under 2% tensile biaxial strain.

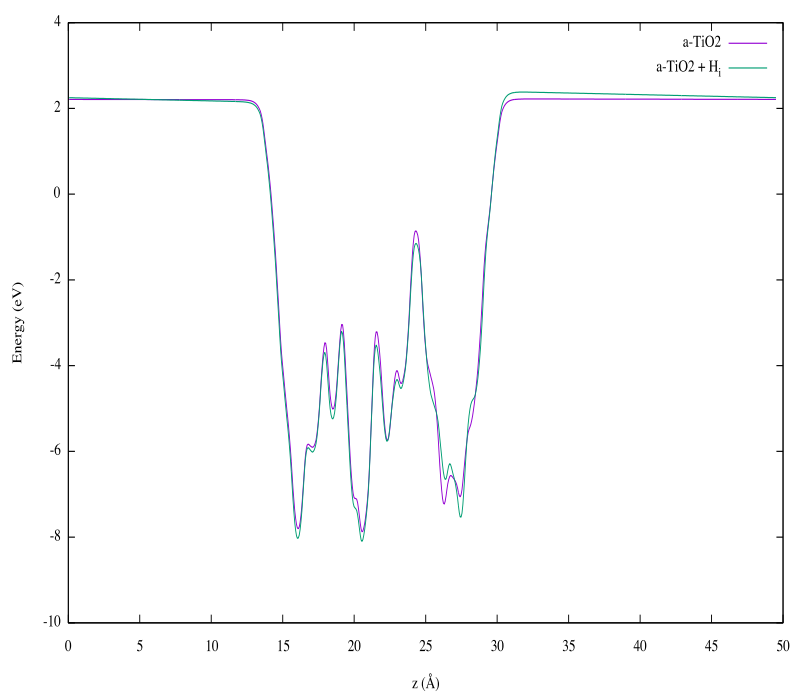

**Figure S6:** The calculated electrostatic potential of the H doped a-TiO<sub>2</sub> as compared with pristine a-TiO<sub>2</sub>.

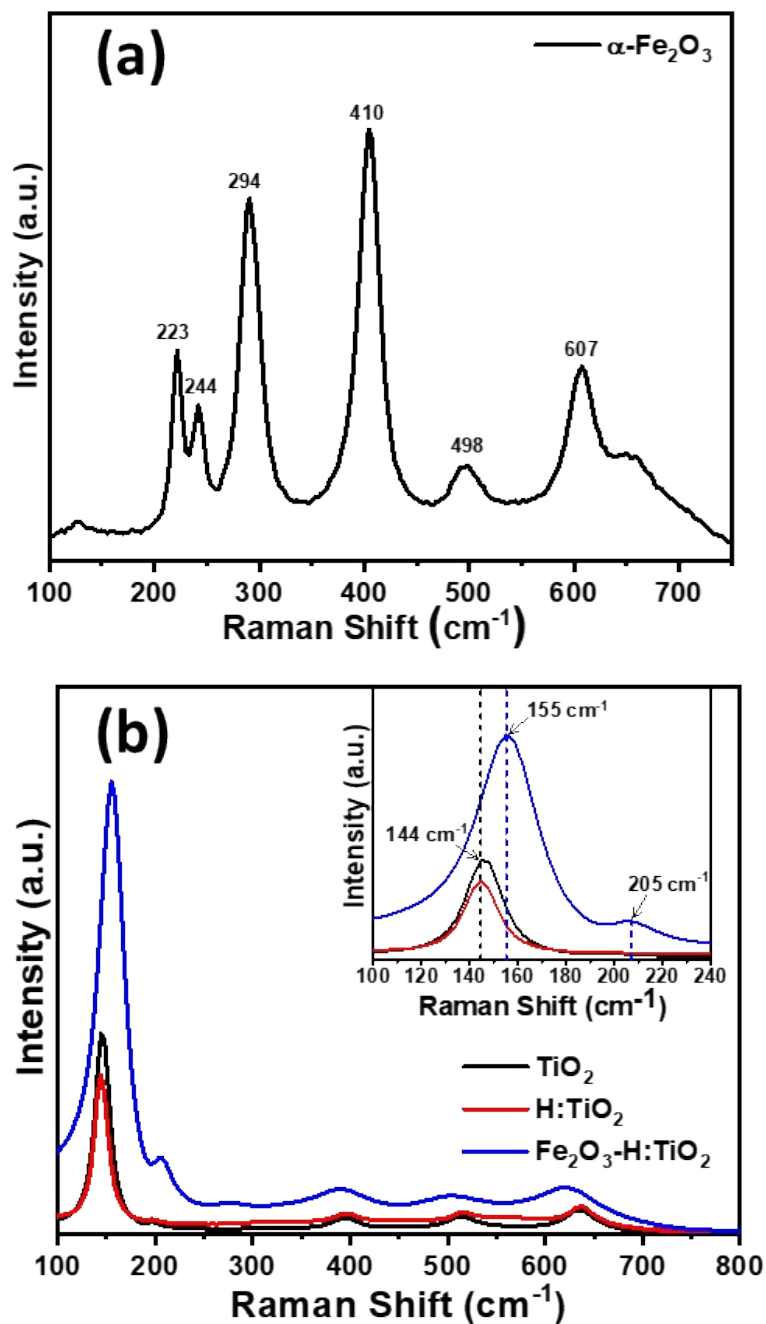

**Figure S7.** (a) Raman spectra of  $\alpha\text{-Fe}_2\text{O}_3$ , and (b) Raman spectra of  $\text{TiO}_2$ ,  $\text{H:TiO}_2$  and  $\text{Fe}_2\text{O}_3\text{-TiO}_2$  heterostructure thin films recorded from wavenumbers in the range of 100-900  $\text{cm}^{-1}$ , Inset of (b) shows the no shift in  $\text{E}_g$  mode of  $\text{TiO}_2$  upon hydrogen doping, however an up-shift of  $\text{E}_g$  mode of  $\text{TiO}_2$  from 141 to 155  $\text{cm}^{-1}$  can be seen in  $\text{Fe}_2\text{O}_3\text{-TiO}_2$  heterostructure.

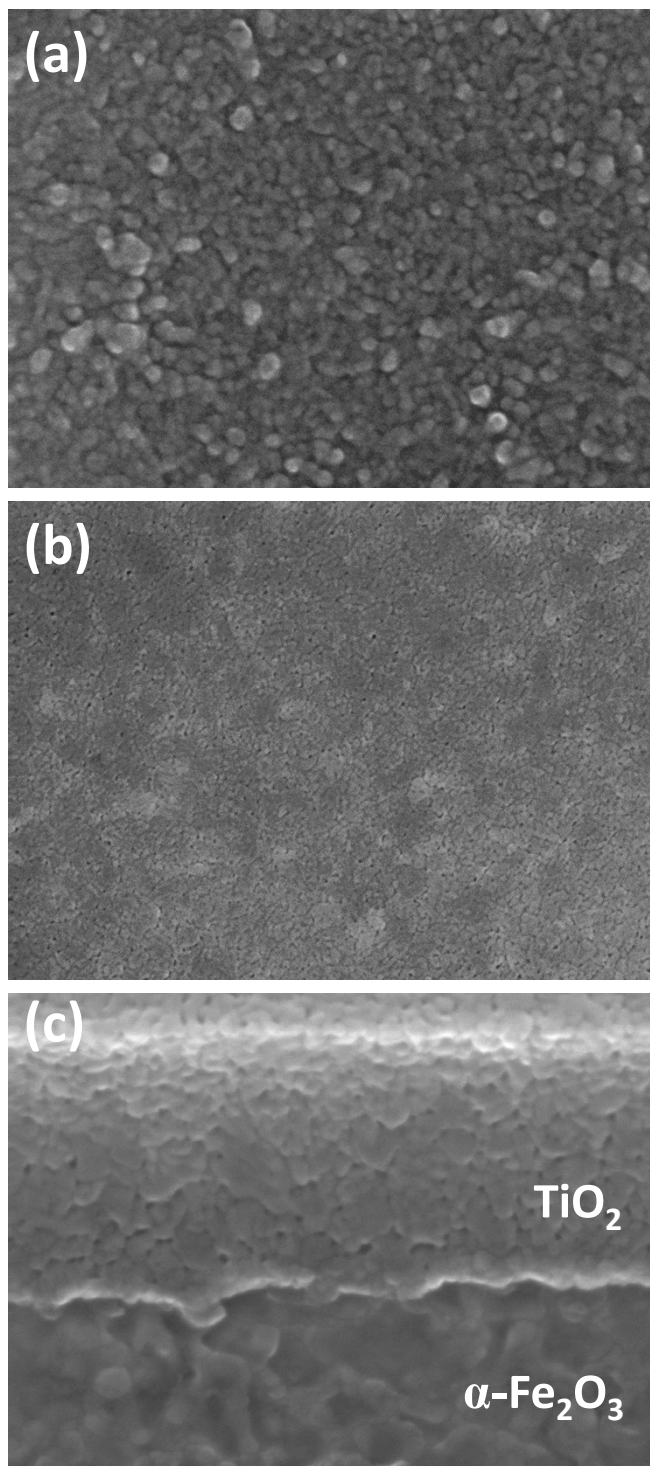

**Figure S8:** SEM images of pristine  $\alpha\text{-Fe}_2\text{O}_3$  and (b) pristine  $\text{TiO}_2$  and (c)  $\text{Fe}_2\text{O}_3\text{-TiO}_2$  heterostructures annealed at 350 °C.



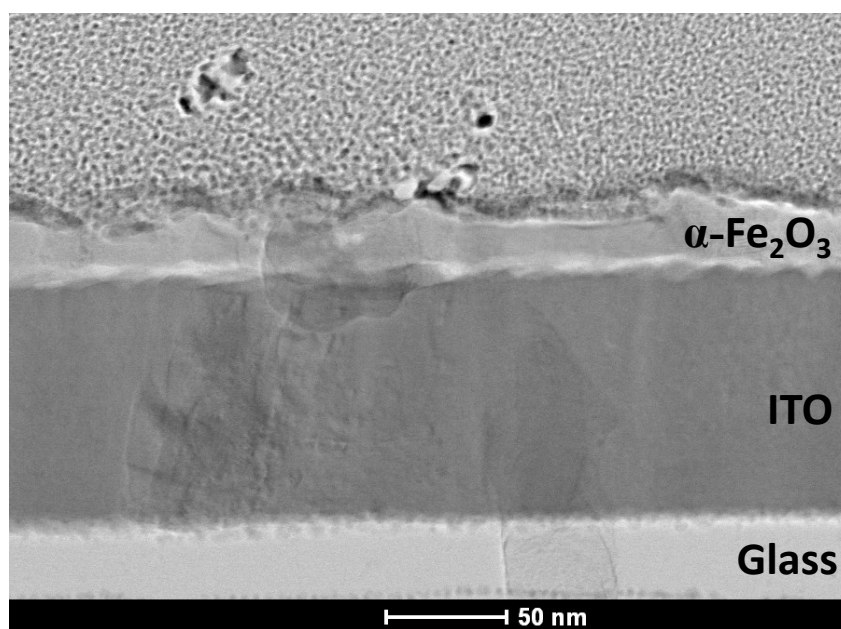

**Figure S9:** TEM images of pristine  $\alpha\text{-Fe}_2\text{O}_3$  annealed at 350 °C.

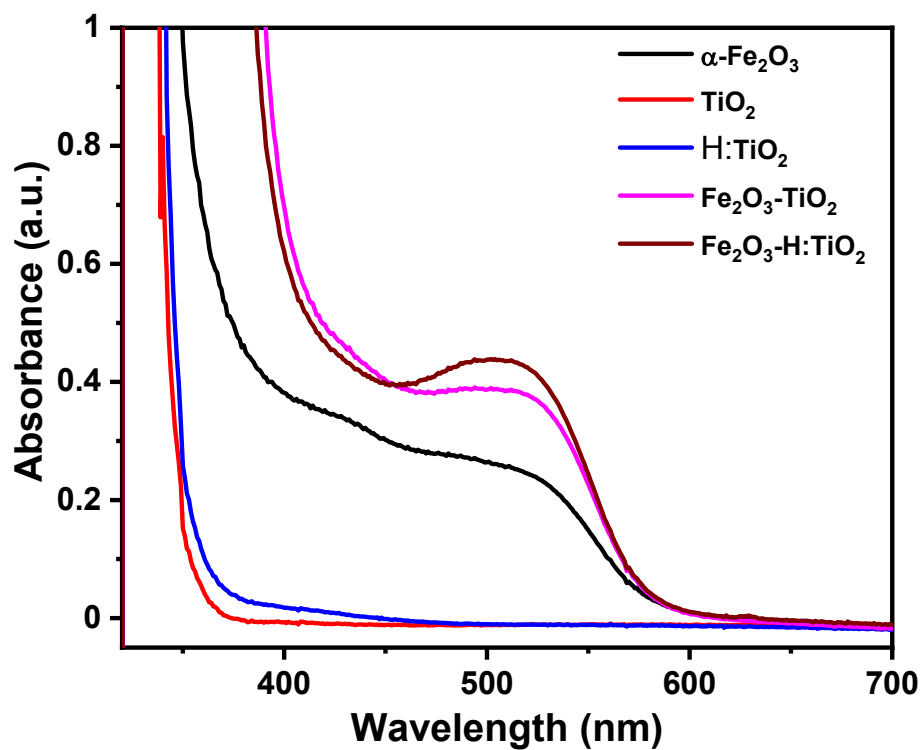

**Figure S10:** Optical absorption spectra of TiO<sub>2</sub>, H:TiO<sub>2</sub>,  $\alpha$ -Fe<sub>2</sub>O<sub>3</sub>, Fe<sub>2</sub>O<sub>3</sub>-TiO<sub>2</sub>, and Fe<sub>2</sub>O<sub>3</sub>-H:TiO<sub>2</sub> heterostructures.

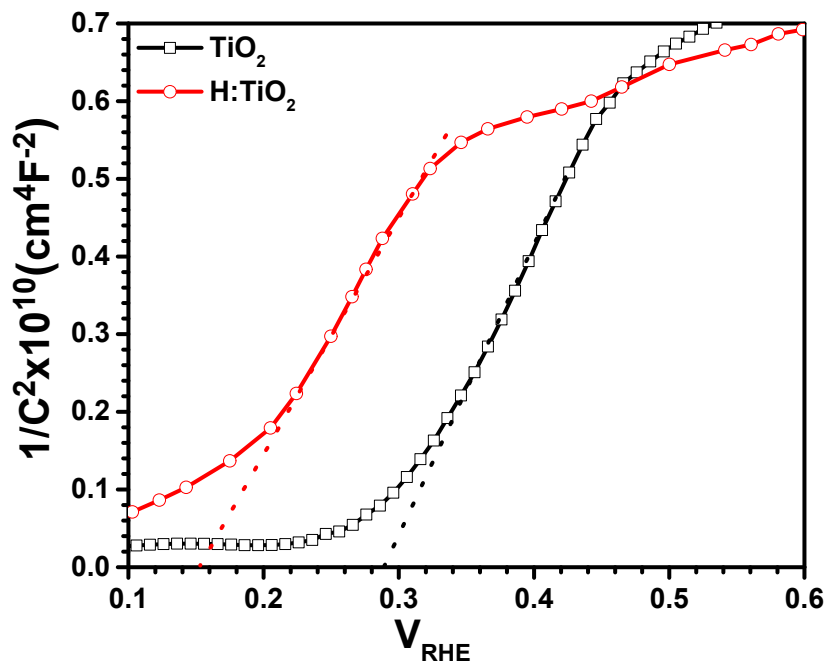

**Figure S11:** Mott-Schottky curves measured in dark condition for pristine and hydrogen doped  $\text{TiO}_2$  photoanodes obtained at 1 kHz.

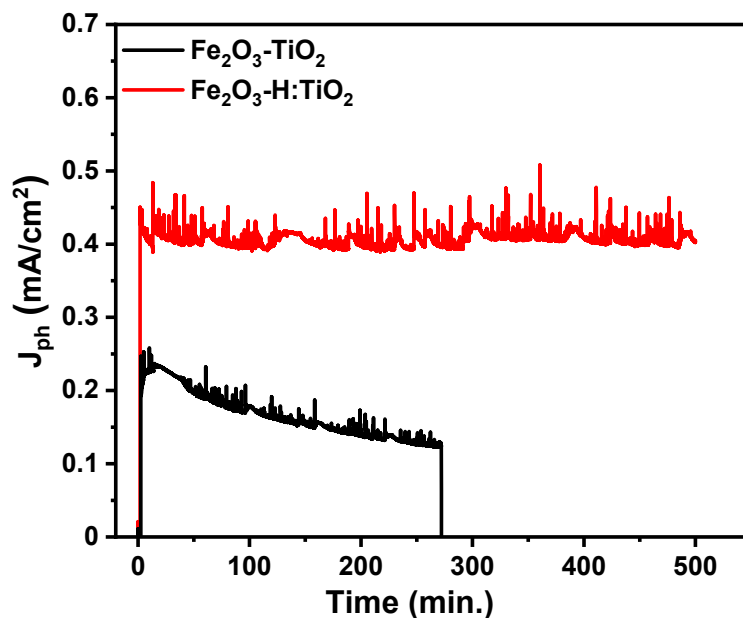

**Figure S12:** Long-term photoanode stability test of Fe<sub>2</sub>O<sub>3</sub>-TiO<sub>2</sub> and Fe<sub>2</sub>O<sub>3</sub>-H:TiO<sub>2</sub> heterostructure under 1 Sun illumination. In order to check the stability of the Fe<sub>2</sub>O<sub>3</sub>-H:TiO<sub>2</sub> heterostructure photoelectrodes, chronoamperometric studies were performed. A bias potential of 0.5 V<sub>RHE</sub> in 0.1 M NaOH solution was applied to the photoelectrode and the photocurrent density is measured for 600 minutes. A stable photocurrent density was found. It is worth noting that the nominal decrease in photocurrent densities in this stability test measurements are achieved at 0.5 V<sub>RHE</sub> applied biases.

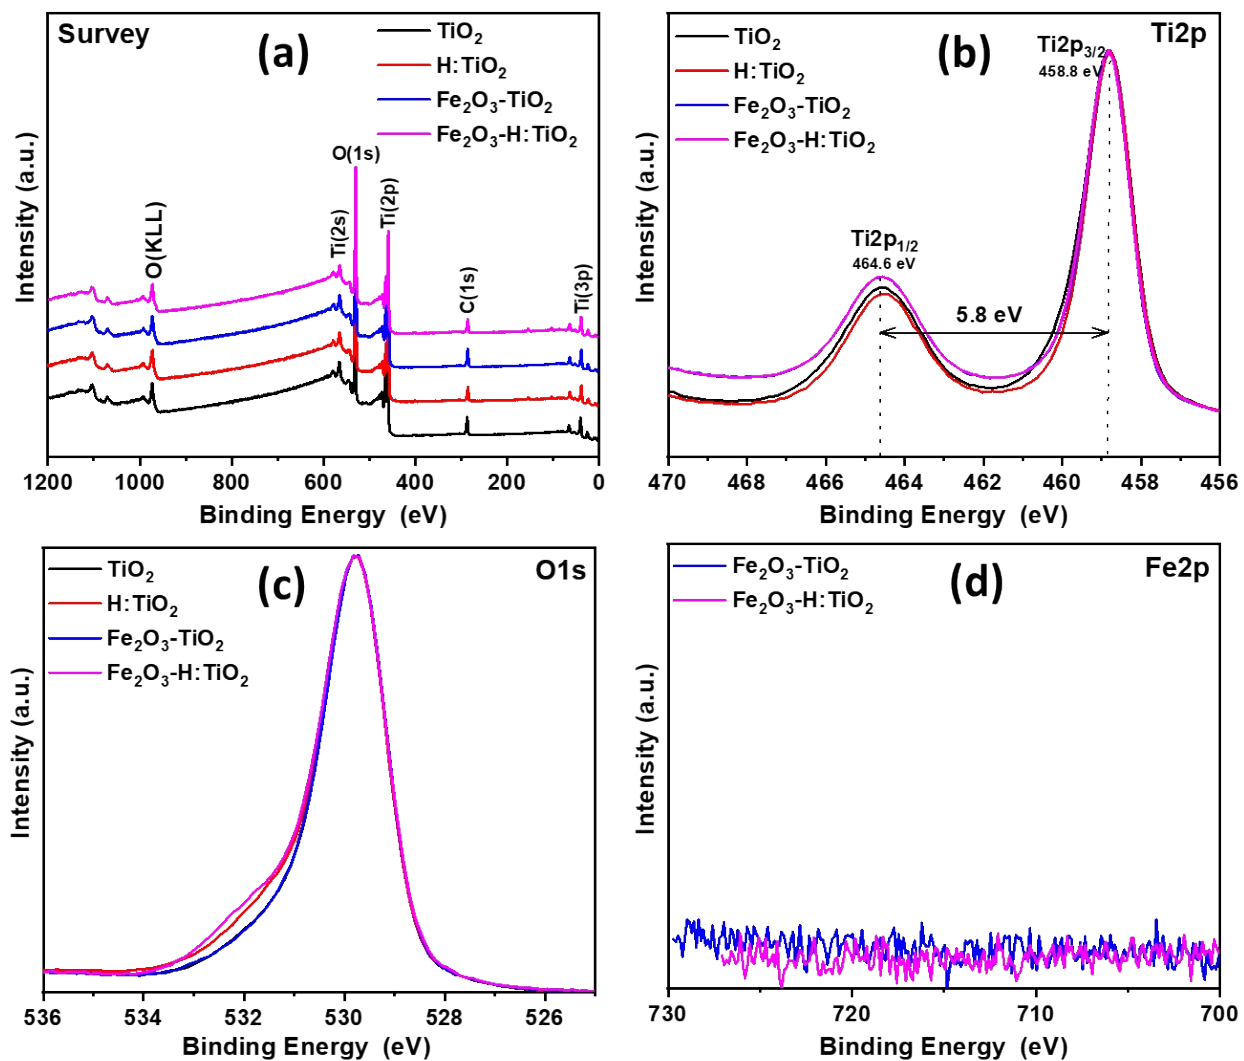

**Figure S13:** (a) XPS survey spectra (b) Ti2p core-level (c) O1s core-level spectra for the pristine TiO<sub>2</sub>, H:TiO<sub>2</sub>, Fe<sub>2</sub>O<sub>3</sub>-TiO<sub>2</sub>, and Fe<sub>2</sub>O<sub>3</sub>-H:TiO<sub>2</sub> specimens and (d) Fe2p core-level spectra for Fe<sub>2</sub>O<sub>3</sub>-TiO<sub>2</sub>, and Fe<sub>2</sub>O<sub>3</sub>-H:TiO<sub>2</sub> specimens.
